# Supplementary material
Source: publisher figshare collection journal article supplement (https://acs.figshare.com/ndownloader/files/3950740)
Supplement: Supplementary file 1 [file 3950740]

 
data_lop159colp21c 
 
_audit_creation_method            SHELXL-97 
_chemical_name_systematic 
; 
 ? 
; 
_chemical_name_common             ? 
_chemical_melting_point           ? 
_chemical_formula_moiety          ? 
_chemical_formula_sum 
 'C31 H30 F6 N6 O3 S' 
_chemical_formula_weight          680.67 
 
loop_ 
 _atom_type_symbol 
 _atom_type_description 
 _atom_type_scat_dispersion_real 
 _atom_type_scat_dispersion_imag 
 _atom_type_scat_source 
 'C'  'C'   0.0033   0.0016 
 'International Tables Vol C Tables 4.2.6.8 and 6.1.1.4' 
 'H'  'H'   0.0000   0.0000 
 'International Tables Vol C Tables 4.2.6.8 and 6.1.1.4' 
 'N'  'N'   0.0061   0.0033 
 'International Tables Vol C Tables 4.2.6.8 and 6.1.1.4' 
 'O'  'O'   0.0106   0.0060 
 'International Tables Vol C Tables 4.2.6.8 and 6.1.1.4' 
 'F'  'F'   0.0171   0.0103 
 'International Tables Vol C Tables 4.2.6.8 and 6.1.1.4' 
 'S'  'S'   0.1246   0.1234 
 'International Tables Vol C Tables 4.2.6.8 and 6.1.1.4' 
 
_symmetry_cell_setting            Monoclinic 
_symmetry_space_group_name_H-M    P2(1)/c   
 
loop_ 
 _symmetry_equiv_pos_as_xyz 
 'x, y, z' 
 '-x, y+1/2, -z+1/2' 
 '-x, -y, -z' 
 'x, -y-1/2, z-1/2' 
 
_cell_length_a                    13.442(1) 
_cell_length_b                    23.750(2) 
_cell_length_c                    9.908(1) 
_cell_angle_alpha                 90.00 
_cell_angle_beta                  99.766(5) 
_cell_angle_gamma                 90.00 
_cell_volume                      3117.2 
_cell_formula_units_Z             4 
_cell_measurement_temperature     100(2) 
_cell_measurement_reflns_used    2309
_cell_measurement_theta_min        2.30
_cell_measurement_theta_max       23.73
 
_exptl_crystal_description        plate 
_exptl_crystal_colour             orange 
_exptl_crystal_size_max           0.10 
_exptl_crystal_size_mid           0.10 
_exptl_crystal_size_min           0.10 
_exptl_crystal_density_meas       ? 
_exptl_crystal_density_diffrn     1.450 
_exptl_crystal_density_method     'not measured' 
_exptl_crystal_F_000              1408 
_exptl_absorpt_coefficient_mu     0.184 
_exptl_absorpt_correction_type    empirical
_exptl_absorpt_correction_T_min   0.9666
_exptl_absorpt_correction_T_max   0.9819
_exptl_absorpt_process_details     
; 
 SADABS Version 2008/1 Bruker-Nonius
 Blessing, Acta Cryst. (1995) A51 33-38
; 
_exptl_special_details 
; 
 It should be noted that the esd's of the cell dimensions are probably too low;
 they should be multiplied by a factor of 2 to 10
; 
_diffrn_ambient_temperature       100(2)
_diffrn_measurement_specimen_suppport
                'magnetic support whith 10 micron nylon fiber cryoloop'
_diffrn_radiation_wavelength      0.71073 
_diffrn_radiation_type            MoK\a 
_diffrn_source                    'rotating anode X-ray tube' 
_diffrn_source_type               'Bruker-Nonius FR 591'
_diffrn_source_power              50
_diffrn_source_current            70
_diffrn_source_size               '3 mm x 0.3 mm fine focus'
_diffrn_radiation_monochromator   'Multilayer Montel 200 mirrors' 
_diffrn_detector_type             '4K CCD area detector APEX II' 
_diffrn_measurement_device_type   'Kappa 4-axis goniometer bruker-nonius' 
_diffrn_measurement_method         
;
 Fullsphere data collection, phi and omega scans
;
_diffrn_detector_area_resol_mean  512 
_diffrn_reflns_number             34124 
_diffrn_reflns_av_R_equivalents   0.1465 
_diffrn_reflns_av_sigmaI/netI     0.1665 
_diffrn_reflns_limit_h_min        -19 
_diffrn_reflns_limit_h_max        19 
_diffrn_reflns_limit_k_min        -34 
_diffrn_reflns_limit_k_max        32 
_diffrn_reflns_limit_l_min        -14 
_diffrn_reflns_limit_l_max        14 
_diffrn_reflns_theta_min          1.54 
_diffrn_reflns_theta_max          31.45 
_reflns_number_total              10116 
_reflns_number_gt                 4446 
_reflns_threshold_expression      >2sigma(I)
 
_computing_data_collection        'Bruker APEX2 v2009.1-0' 
_computing_cell_refinement        'Bruker APEX2 v2009.1-0' 
_computing_data_reduction         'Bruker SAINT V7.60A' 
_computing_structure_solution     'SHELXS-97 (Sheldrick, 2008)' 
_computing_structure_refinement   'SHELXS-97 (Sheldrick, 2008)' 
_computing_molecular_graphics     'Bruker SHELXTL' 
_computing_publication_material   'Bruker SHELXTL' 
 
_refine_special_details 
; 
 Refinement of F^2^ against ALL reflections.  The weighted R-factor wR and 
 goodness of fit S are based on F^2^, conventional R-factors R are based 
 on F, with F set to zero for negative F^2^. The threshold expression of 
 F^2^ > 2sigma(F^2^) is used only for calculating R-factors(gt) etc. and is 
 not relevant to the choice of reflections for refinement.  R-factors based 
 on F^2^ are statistically about twice as large as those based on F, and R- 
 factors based on ALL data will be even larger. 
; 
 
_refine_ls_structure_factor_coef  Fsqd  
_refine_ls_matrix_type            full 
_refine_ls_weighting_scheme       calc  
_refine_ls_weighting_details 
 'calc w=1/[\s^2^(Fo^2^)+(0.1050P)^2^+0.0000P] where P=(Fo^2^+2Fc^2^)/3' 
_atom_sites_solution_primary      direct 
_atom_sites_solution_secondary    difmap 
_atom_sites_solution_hydrogens    geom 
_refine_ls_hydrogen_treatment     noref
_refine_ls_extinction_method      none 
_refine_ls_extinction_coef        ? 
_refine_ls_number_reflns          10116 
_refine_ls_number_parameters      430 
_refine_ls_number_restraints      4 
_refine_ls_R_factor_all           0.2077 
_refine_ls_R_factor_gt            0.0888 
_refine_ls_wR_factor_ref          0.2483 
_refine_ls_wR_factor_gt           0.2002 
_refine_ls_goodness_of_fit_ref    1.031 
_refine_ls_restrained_S_all       1.032 
_refine_ls_shift/su_max           0.001 
_refine_ls_shift/su_mean          0.000 
 
loop_ 
 _atom_site_label 
 _atom_site_type_symbol 
 _atom_site_fract_x 
 _atom_site_fract_y 
 _atom_site_fract_z 
 _atom_site_U_iso_or_equiv 
 _atom_site_adp_type 
 _atom_site_occupancy 
 _atom_site_symmetry_multiplicity 
 _atom_site_calc_flag 
 _atom_site_refinement_flags 
 _atom_site_disorder_assembly 
 _atom_site_disorder_group 
S1 S 0.69549(7) 0.16772(3) 1.19877(9) 0.0288(2) Uani 1 1 d . . . 
O1 O 0.24616(17) 0.63395(9) 0.6240(2) 0.0256(6) Uani 1 1 d . . . 
N1 N 0.6449(2) 0.27701(11) 1.2159(3) 0.0254(7) Uani 1 1 d . . . 
H1A H 0.6548 0.3078 1.2657 0.030 Uiso 1 1 calc R . . 
F1 F 1.0172(2) 0.30404(11) 1.7872(3) 0.0715(9) Uani 1 1 d . . . 
C1 C 0.5685(2) 0.33575(13) 1.0336(3) 0.0237(7) Uani 1 1 d . . . 
H1B H 0.6107 0.3651 1.0758 0.028 Uiso 1 1 calc R . . 
O1W O 0.8287(3) 0.61745(15) 0.4632(4) 0.0836(13) Uani 1 1 d D . . 
H1W H 0.7723(7) 0.6181(10) 0.4943(18) 0.100 Uiso 1 1 d D . . 
H2W H 0.8257(19) 0.6470(6) 0.414(2) 0.100 Uiso 1 1 d D . . 
O2 O 0.64702(19) 0.61469(11) 0.5853(3) 0.0362(7) Uani 1 1 d D . . 
N2 N 0.7632(2) 0.24657(11) 1.3879(3) 0.0301(7) Uani 1 1 d . . . 
H2A H 0.7629 0.2828 1.4067 0.036 Uiso 1 1 calc R . . 
F2 F 1.1285(2) 0.26211(12) 1.6925(3) 0.0590(8) Uani 1 1 d . . . 
C2 C 0.5746(2) 0.28248(13) 1.0928(3) 0.0228(7) Uani 1 1 d . . . 
F3 F 1.0880(2) 0.22977(12) 1.8762(3) 0.0602(8) Uani 1 1 d . . . 
C3 C 0.5105(3) 0.24000(13) 1.0323(3) 0.0244(8) Uani 1 1 d . . . 
H3A H 0.5127 0.2036 1.0726 0.029 Uiso 1 1 calc R . . 
N3 N 0.5063(2) 0.40259(11) 0.8623(3) 0.0267(7) Uani 1 1 d . . . 
F4 F 0.9089(2) 0.05497(9) 1.7678(2) 0.0465(6) Uani 1 1 d . . . 
N4 N 0.4334(2) 0.41583(11) 0.7700(3) 0.0251(6) Uani 1 1 d . . . 
C4 C 0.4430(3) 0.25137(14) 0.9117(3) 0.0274(8) Uani 1 1 d . . . 
H4B H 0.3991 0.2224 0.8712 0.033 Uiso 1 1 calc R . . 
F5 F 0.92322(18) 0.03963(9) 1.5585(2) 0.0406(6) Uani 1 1 d . . . 
N5 N 0.1885(2) 0.56436(11) 0.4758(3) 0.0251(7) Uani 1 1 d . . . 
C5 C 0.4387(3) 0.30400(13) 0.8497(4) 0.0266(8) Uani 1 1 d . . . 
H5A H 0.3942 0.3108 0.7660 0.032 Uiso 1 1 calc R . . 
F6 F 0.77599(18) 0.05357(9) 1.6122(3) 0.0476(7) Uani 1 1 d . . . 
N6 N 0.7000(2) 0.58734(12) 0.8049(3) 0.0282(7) Uani 1 1 d . . . 
C6 C 0.5011(3) 0.34657(13) 0.9130(4) 0.0245(8) Uani 1 1 d . . . 
C7 C 0.6998(3) 0.23130(13) 1.2695(3) 0.0232(7) Uani 1 1 d . . . 
C8 C 0.8279(3) 0.21466(14) 1.4835(3) 0.0264(8) Uani 1 1 d . . . 
C9 C 0.9045(3) 0.24537(15) 1.5672(4) 0.0308(9) Uani 1 1 d . . . 
H9A H 0.9132 0.2843 1.5504 0.037 Uiso 1 1 calc R . . 
C10 C 0.9676(3) 0.21869(15) 1.6746(4) 0.0315(9) Uani 1 1 d . . . 
C11 C 0.9571(3) 0.16241(15) 1.7002(4) 0.0322(9) Uani 1 1 d . . . 
H11A H 0.9996 0.1445 1.7741 0.039 Uiso 1 1 calc R . . 
C12 C 0.8833(3) 0.13232(15) 1.6160(4) 0.0279(8) Uani 1 1 d . . . 
C13 C 0.8179(3) 0.15763(14) 1.5071(3) 0.0254(8) Uani 1 1 d . . . 
H13A H 0.7678 0.1360 1.4507 0.030 Uiso 1 1 calc R . . 
C14 C 1.0499(3) 0.25399(16) 1.7572(4) 0.0401(11) Uani 1 1 d . . . 
C15 C 0.8724(3) 0.07059(16) 1.6385(4) 0.0341(9) Uani 1 1 d . . . 
C16 C 0.4422(3) 0.47228(13) 0.7222(3) 0.0233(7) Uani 1 1 d . . . 
C17 C 0.3514(2) 0.49873(13) 0.6649(3) 0.0229(7) Uani 1 1 d . . . 
H17A H 0.2892 0.4788 0.6556 0.028 Uiso 1 1 calc R . . 
C18 C 0.3535(2) 0.55437(13) 0.6219(3) 0.0226(7) Uani 1 1 d . . . 
C19 C 0.4447(3) 0.58283(13) 0.6306(3) 0.0244(7) Uani 1 1 d . . . 
H19A H 0.4455 0.6206 0.5993 0.029 Uiso 1 1 calc R . . 
C20 C 0.5355(2) 0.55600(13) 0.6856(3) 0.0234(7) Uani 1 1 d . . . 
C21 C 0.5333(3) 0.50051(14) 0.7310(3) 0.0262(8) Uani 1 1 d . . . 
H21A H 0.5945 0.4820 0.7682 0.031 Uiso 1 1 calc R . . 
C22 C 0.2584(3) 0.58693(13) 0.5732(3) 0.0240(7) Uani 1 1 d . . . 
C23 C 0.1975(3) 0.51370(15) 0.3941(4) 0.0335(9) Uani 1 1 d . . . 
H23A H 0.1745 0.4798 0.4382 0.040 Uiso 1 1 calc R . . 
H23B H 0.2680 0.5079 0.3802 0.040 Uiso 1 1 calc R . . 
C24 C 0.1298(3) 0.52644(18) 0.2620(4) 0.0482(12) Uani 1 1 d . . . 
H24A H 0.1051 0.4913 0.2138 0.058 Uiso 1 1 calc R . . 
H24B H 0.1654 0.5492 0.2014 0.058 Uiso 1 1 calc R . . 
C25 C 0.0434(3) 0.55934(17) 0.3044(5) 0.0469(12) Uani 1 1 d . . . 
H25A H -0.0055 0.5339 0.3376 0.056 Uiso 1 1 calc R . . 
H25B H 0.0078 0.5821 0.2274 0.056 Uiso 1 1 calc R . . 
C26 C 0.0964(3) 0.59671(14) 0.4191(4) 0.0290(8) Uani 1 1 d . . . 
H26A H 0.1141 0.6336 0.3833 0.035 Uiso 1 1 calc R . . 
H26B H 0.0535 0.6029 0.4896 0.035 Uiso 1 1 calc R . . 
C27 C 0.6311(3) 0.58824(13) 0.6888(4) 0.0260(8) Uani 1 1 d . . . 
C28 C 0.7922(3) 0.62148(17) 0.8133(4) 0.0368(10) Uani 1 1 d . . . 
H28A H 0.7756 0.6616 0.7933 0.044 Uiso 1 1 calc R . . 
H28B H 0.8352 0.6077 0.7485 0.044 Uiso 1 1 calc R . . 
C29 C 0.8452(3) 0.61366(19) 0.9634(4) 0.0432(11) Uani 1 1 d . . . 
H29A H 0.8907 0.5806 0.9728 0.052 Uiso 1 1 calc R . . 
H29B H 0.8844 0.6476 0.9975 0.052 Uiso 1 1 calc R . . 
C30 C 0.7574(3) 0.6046(2) 1.0387(4) 0.0494(12) Uani 1 1 d . . . 
H30A H 0.7249 0.6408 1.0550 0.059 Uiso 1 1 calc R . . 
H30B H 0.7796 0.5856 1.1276 0.059 Uiso 1 1 calc R . . 
C31 C 0.6857(3) 0.56721(18) 0.9411(4) 0.0374(10) Uani 1 1 d . . . 
H31A H 0.7043 0.5270 0.9540 0.045 Uiso 1 1 calc R . . 
H31B H 0.6150 0.5723 0.9546 0.045 Uiso 1 1 calc R . . 
 
loop_ 
 _atom_site_aniso_label 
 _atom_site_aniso_U_11 
 _atom_site_aniso_U_22 
 _atom_site_aniso_U_33 
 _atom_site_aniso_U_23 
 _atom_site_aniso_U_13 
 _atom_site_aniso_U_12 
S1 0.0456(5) 0.0169(4) 0.0219(4) -0.0032(3) -0.0001(4) 0.0042(3) 
O1 0.0358(13) 0.0162(11) 0.0221(12) -0.0007(9) -0.0025(10) 0.0016(9) 
N1 0.0394(16) 0.0154(12) 0.0188(14) -0.0001(11) -0.0020(13) 0.0008(11) 
F1 0.0857(19) 0.0433(15) 0.0674(19) -0.0280(13) -0.0386(16) 0.0194(13) 
C1 0.0271(16) 0.0210(15) 0.0222(16) -0.0028(13) 0.0022(14) -0.0012(13) 
O1W 0.115(3) 0.056(2) 0.081(3) 0.013(2) 0.020(3) 0.007(2) 
O2 0.0414(14) 0.0324(14) 0.0331(15) 0.0102(12) 0.0016(12) -0.0051(11) 
N2 0.0459(17) 0.0138(13) 0.0262(16) -0.0026(11) -0.0068(14) 0.0067(12) 
F2 0.0652(17) 0.0603(16) 0.0476(16) -0.0081(13) -0.0015(14) -0.0172(13) 
C2 0.0303(17) 0.0198(15) 0.0167(15) 0.0008(12) -0.0006(14) 0.0009(13) 
F3 0.0710(17) 0.0666(17) 0.0311(13) 0.0073(12) -0.0252(13) 0.0007(14) 
C3 0.0381(18) 0.0117(13) 0.0224(17) 0.0017(12) 0.0022(15) -0.0017(12) 
N3 0.0391(16) 0.0201(13) 0.0201(14) 0.0019(11) 0.0026(13) 0.0038(12) 
F4 0.0826(17) 0.0316(12) 0.0242(11) 0.0091(9) 0.0060(12) 0.0170(11) 
N4 0.0368(15) 0.0167(13) 0.0208(14) 0.0051(11) 0.0023(13) 0.0032(11) 
C4 0.0362(18) 0.0211(16) 0.0220(17) -0.0040(13) -0.0032(15) -0.0021(13) 
F5 0.0669(15) 0.0276(11) 0.0265(11) -0.0001(9) 0.0058(11) 0.0108(10) 
N5 0.0348(15) 0.0179(13) 0.0197(14) -0.0034(11) -0.0035(12) 0.0011(11) 
C5 0.0394(19) 0.0184(15) 0.0191(16) -0.0014(13) -0.0031(15) 0.0010(13) 
F6 0.0566(14) 0.0260(11) 0.0595(16) 0.0136(11) 0.0074(13) -0.0003(10) 
N6 0.0316(15) 0.0289(15) 0.0237(15) -0.0015(12) 0.0033(13) -0.0016(12) 
C6 0.0346(18) 0.0166(14) 0.0207(16) 0.0020(12) 0.0006(15) 0.0028(13) 
C7 0.0359(18) 0.0167(14) 0.0166(15) 0.0034(12) 0.0036(14) 0.0024(13) 
C8 0.0369(19) 0.0225(16) 0.0176(16) 0.0013(13) -0.0016(15) 0.0071(13) 
C9 0.044(2) 0.0215(16) 0.0236(18) -0.0007(14) -0.0046(16) 0.0062(14) 
C10 0.039(2) 0.0299(18) 0.0232(18) -0.0015(15) -0.0011(16) 0.0056(15) 
C11 0.043(2) 0.0279(18) 0.0229(18) 0.0038(15) -0.0012(16) 0.0133(15) 
C12 0.0359(19) 0.0282(17) 0.0207(17) 0.0023(14) 0.0083(15) 0.0089(14) 
C13 0.0336(18) 0.0228(16) 0.0192(16) 0.0017(13) 0.0027(15) 0.0062(13) 
C14 0.057(3) 0.031(2) 0.026(2) -0.0001(16) -0.011(2) 0.0060(18) 
C15 0.044(2) 0.0319(19) 0.0254(19) 0.0080(16) 0.0033(17) 0.0110(16) 
C16 0.0348(18) 0.0172(15) 0.0168(15) 0.0035(12) 0.0007(14) -0.0011(13) 
C17 0.0292(16) 0.0201(15) 0.0172(15) -0.0009(12) -0.0026(14) 0.0000(12) 
C18 0.0331(17) 0.0200(15) 0.0130(15) -0.0008(12) -0.0009(14) 0.0010(13) 
C19 0.0356(18) 0.0177(15) 0.0186(16) 0.0021(12) 0.0006(15) 0.0010(13) 
C20 0.0302(17) 0.0199(15) 0.0191(16) -0.0002(13) 0.0016(14) 0.0008(13) 
C21 0.0324(18) 0.0243(16) 0.0198(16) 0.0018(13) -0.0013(15) 0.0029(13) 
C22 0.0354(18) 0.0189(15) 0.0157(15) 0.0022(12) -0.0018(14) -0.0021(13) 
C23 0.046(2) 0.0256(17) 0.0258(19) -0.0066(15) -0.0020(17) 0.0028(15) 
C24 0.071(3) 0.036(2) 0.029(2) -0.0090(17) -0.017(2) 0.002(2) 
C25 0.053(2) 0.033(2) 0.044(2) -0.0089(18) -0.023(2) 0.0009(17) 
C26 0.0353(19) 0.0234(17) 0.0256(18) -0.0012(14) -0.0028(16) 0.0023(14) 
C27 0.0332(18) 0.0173(15) 0.0265(18) 0.0007(13) 0.0024(15) 0.0024(13) 
C28 0.040(2) 0.037(2) 0.032(2) -0.0070(17) 0.0039(18) -0.0087(16) 
C29 0.041(2) 0.056(3) 0.032(2) -0.013(2) 0.0019(19) -0.0069(19) 
C30 0.044(2) 0.076(3) 0.027(2) -0.014(2) 0.0016(19) -0.002(2) 
C31 0.040(2) 0.050(2) 0.0208(18) 0.0021(17) -0.0003(17) -0.0091(18) 
 
_geom_special_details 
; 
 All esds (except the esd in the dihedral angle between two l.s. planes) 
 are estimated using the full covariance matrix.  The cell esds are taken 
 into account individually in the estimation of esds in distances, angles 
 and torsion angles; correlations between esds in cell parameters are only 
 used when they are defined by crystal symmetry.  An approximate (isotropic) 
 treatment of cell esds is used for estimating esds involving l.s. planes. 
; 
 
loop_ 
 _geom_bond_atom_site_label_1 
 _geom_bond_atom_site_label_2 
 _geom_bond_distance 
 _geom_bond_site_symmetry_2 
 _geom_bond_publ_flag 
S1 C7 1.662(3) . ? 
O1 C22 1.247(4) . ? 
N1 C7 1.368(4) . ? 
N1 C2 1.416(4) . ? 
F1 C14 1.318(5) . ? 
C1 C2 1.391(4) . ? 
C1 C6 1.396(4) . ? 
O2 C27 1.251(4) . ? 
N2 C7 1.377(4) . ? 
N2 C8 1.395(4) . ? 
F2 C14 1.340(5) . ? 
C2 C3 1.394(4) . ? 
F3 C14 1.334(4) . ? 
C3 C4 1.398(4) . ? 
N3 N4 1.262(4) . ? 
N3 C6 1.428(4) . ? 
F4 C15 1.344(4) . ? 
N4 C16 1.433(4) . ? 
C4 C5 1.390(5) . ? 
F5 C15 1.348(4) . ? 
N5 C22 1.339(4) . ? 
N5 C23 1.467(4) . ? 
N5 C26 1.483(4) . ? 
C5 C6 1.393(4) . ? 
F6 C15 1.341(5) . ? 
N6 C27 1.349(4) . ? 
N6 C28 1.472(5) . ? 
N6 C31 1.474(5) . ? 
C8 C13 1.385(5) . ? 
C8 C9 1.411(5) . ? 
C9 C10 1.395(5) . ? 
C10 C11 1.372(5) . ? 
C10 C14 1.513(5) . ? 
C11 C12 1.382(5) . ? 
C12 C13 1.405(4) . ? 
C12 C15 1.494(5) . ? 
C16 C21 1.386(5) . ? 
C16 C17 1.404(4) . ? 
C17 C18 1.390(4) . ? 
C18 C19 1.389(5) . ? 
C18 C22 1.502(4) . ? 
C19 C20 1.403(4) . ? 
C20 C21 1.394(5) . ? 
C20 C27 1.491(5) . ? 
C23 C24 1.493(5) . ? 
C24 C25 1.517(6) . ? 
C25 C26 1.521(5) . ? 
C28 C29 1.547(5) . ? 
C29 C30 1.515(6) . ? 
C30 C31 1.528(5) . ? 
 
loop_ 
 _geom_angle_atom_site_label_1 
 _geom_angle_atom_site_label_2 
 _geom_angle_atom_site_label_3 
 _geom_angle 
 _geom_angle_site_symmetry_1 
 _geom_angle_site_symmetry_3 
 _geom_angle_publ_flag 
C7 N1 C2 130.1(3) . . ? 
C2 C1 C6 120.8(3) . . ? 
C7 N2 C8 131.3(3) . . ? 
C1 C2 C3 119.3(3) . . ? 
C1 C2 N1 115.4(3) . . ? 
C3 C2 N1 125.3(3) . . ? 
C2 C3 C4 119.4(3) . . ? 
N4 N3 C6 114.1(3) . . ? 
N3 N4 C16 112.0(3) . . ? 
C5 C4 C3 121.6(3) . . ? 
C22 N5 C23 127.7(3) . . ? 
C22 N5 C26 120.2(3) . . ? 
C23 N5 C26 111.0(3) . . ? 
C4 C5 C6 118.5(3) . . ? 
C27 N6 C28 119.3(3) . . ? 
C27 N6 C31 127.5(3) . . ? 
C28 N6 C31 111.5(3) . . ? 
C5 C6 C1 120.4(3) . . ? 
C5 C6 N3 125.5(3) . . ? 
C1 C6 N3 114.1(3) . . ? 
N1 C7 N2 109.7(3) . . ? 
N1 C7 S1 125.4(2) . . ? 
N2 C7 S1 124.8(2) . . ? 
C13 C8 N2 125.4(3) . . ? 
C13 C8 C9 119.2(3) . . ? 
N2 C8 C9 115.2(3) . . ? 
C10 C9 C8 120.1(3) . . ? 
C11 C10 C9 121.0(3) . . ? 
C11 C10 C14 121.9(3) . . ? 
C9 C10 C14 117.0(3) . . ? 
C10 C11 C12 118.6(3) . . ? 
C11 C12 C13 122.2(3) . . ? 
C11 C12 C15 119.7(3) . . ? 
C13 C12 C15 118.1(3) . . ? 
C8 C13 C12 118.8(3) . . ? 
F1 C14 F3 106.4(3) . . ? 
F1 C14 F2 107.3(4) . . ? 
F3 C14 F2 105.6(3) . . ? 
F1 C14 C10 112.4(3) . . ? 
F3 C14 C10 112.1(3) . . ? 
F2 C14 C10 112.6(3) . . ? 
F6 C15 F4 106.7(3) . . ? 
F6 C15 F5 106.9(3) . . ? 
F4 C15 F5 105.7(3) . . ? 
F6 C15 C12 112.5(3) . . ? 
F4 C15 C12 112.6(3) . . ? 
F5 C15 C12 112.1(3) . . ? 
C21 C16 C17 120.5(3) . . ? 
C21 C16 N4 123.6(3) . . ? 
C17 C16 N4 115.9(3) . . ? 
C18 C17 C16 119.2(3) . . ? 
C19 C18 C17 120.5(3) . . ? 
C19 C18 C22 117.6(3) . . ? 
C17 C18 C22 121.8(3) . . ? 
C18 C19 C20 120.2(3) . . ? 
C21 C20 C19 119.3(3) . . ? 
C21 C20 C27 123.0(3) . . ? 
C19 C20 C27 117.7(3) . . ? 
C16 C21 C20 120.3(3) . . ? 
O1 C22 N5 121.6(3) . . ? 
O1 C22 C18 119.7(3) . . ? 
N5 C22 C18 118.7(3) . . ? 
N5 C23 C24 102.8(3) . . ? 
C23 C24 C25 104.1(3) . . ? 
C24 C25 C26 103.0(3) . . ? 
N5 C26 C25 103.6(3) . . ? 
O2 C27 N6 121.2(3) . . ? 
O2 C27 C20 120.5(3) . . ? 
N6 C27 C20 118.3(3) . . ? 
N6 C28 C29 103.5(3) . . ? 
C30 C29 C28 102.7(3) . . ? 
C29 C30 C31 103.4(3) . . ? 
N6 C31 C30 103.0(3) . . ? 
 
loop_ 
 _geom_torsion_atom_site_label_1 
 _geom_torsion_atom_site_label_2 
 _geom_torsion_atom_site_label_3 
 _geom_torsion_atom_site_label_4 
 _geom_torsion 
 _geom_torsion_site_symmetry_1 
 _geom_torsion_site_symmetry_2 
 _geom_torsion_site_symmetry_3 
 _geom_torsion_site_symmetry_4 
 _geom_torsion_publ_flag 
C6 C1 C2 C3 -1.7(5) . . . . ? 
C6 C1 C2 N1 -179.2(3) . . . . ? 
C7 N1 C2 C1 -149.9(4) . . . . ? 
C7 N1 C2 C3 32.7(6) . . . . ? 
C1 C2 C3 C4 1.4(5) . . . . ? 
N1 C2 C3 C4 178.7(3) . . . . ? 
C6 N3 N4 C16 -179.8(3) . . . . ? 
C2 C3 C4 C5 0.6(6) . . . . ? 
C3 C4 C5 C6 -2.3(6) . . . . ? 
C4 C5 C6 C1 2.0(6) . . . . ? 
C4 C5 C6 N3 179.5(4) . . . . ? 
C2 C1 C6 C5 -0.1(6) . . . . ? 
C2 C1 C6 N3 -177.8(3) . . . . ? 
N4 N3 C6 C5 15.5(5) . . . . ? 
N4 N3 C6 C1 -166.9(3) . . . . ? 
C2 N1 C7 N2 176.4(3) . . . . ? 
C2 N1 C7 S1 -0.6(6) . . . . ? 
C8 N2 C7 N1 174.9(4) . . . . ? 
C8 N2 C7 S1 -8.1(6) . . . . ? 
C7 N2 C8 C13 -24.2(6) . . . . ? 
C7 N2 C8 C9 160.4(4) . . . . ? 
C13 C8 C9 C10 -1.7(6) . . . . ? 
N2 C8 C9 C10 174.1(3) . . . . ? 
C8 C9 C10 C11 0.5(6) . . . . ? 
C8 C9 C10 C14 178.3(4) . . . . ? 
C9 C10 C11 C12 0.8(6) . . . . ? 
C14 C10 C11 C12 -176.8(4) . . . . ? 
C10 C11 C12 C13 -1.1(6) . . . . ? 
C10 C11 C12 C15 177.9(4) . . . . ? 
N2 C8 C13 C12 -173.9(3) . . . . ? 
C9 C8 C13 C12 1.4(5) . . . . ? 
C11 C12 C13 C8 -0.1(6) . . . . ? 
C15 C12 C13 C8 -179.1(3) . . . . ? 
C11 C10 C14 F1 -138.4(4) . . . . ? 
C9 C10 C14 F1 43.9(5) . . . . ? 
C11 C10 C14 F3 -18.6(6) . . . . ? 
C9 C10 C14 F3 163.6(4) . . . . ? 
C11 C10 C14 F2 100.3(4) . . . . ? 
C9 C10 C14 F2 -77.5(4) . . . . ? 
C11 C12 C15 F6 144.8(4) . . . . ? 
C13 C12 C15 F6 -36.2(5) . . . . ? 
C11 C12 C15 F4 24.2(5) . . . . ? 
C13 C12 C15 F4 -156.7(3) . . . . ? 
C11 C12 C15 F5 -94.8(4) . . . . ? 
C13 C12 C15 F5 84.3(4) . . . . ? 
N3 N4 C16 C21 24.6(5) . . . . ? 
N3 N4 C16 C17 -155.0(3) . . . . ? 
C21 C16 C17 C18 -2.5(5) . . . . ? 
N4 C16 C17 C18 177.2(3) . . . . ? 
C16 C17 C18 C19 2.4(5) . . . . ? 
C16 C17 C18 C22 -173.6(3) . . . . ? 
C17 C18 C19 C20 -1.3(5) . . . . ? 
C22 C18 C19 C20 174.9(3) . . . . ? 
C18 C19 C20 C21 0.1(5) . . . . ? 
C18 C19 C20 C27 178.4(3) . . . . ? 
C17 C16 C21 C20 1.3(5) . . . . ? 
N4 C16 C21 C20 -178.3(3) . . . . ? 
C19 C20 C21 C16 -0.1(5) . . . . ? 
C27 C20 C21 C16 -178.3(3) . . . . ? 
C23 N5 C22 O1 171.1(3) . . . . ? 
C26 N5 C22 O1 3.9(5) . . . . ? 
C23 N5 C22 C18 -9.0(5) . . . . ? 
C26 N5 C22 C18 -176.2(3) . . . . ? 
C19 C18 C22 O1 -48.0(5) . . . . ? 
C17 C18 C22 O1 128.1(4) . . . . ? 
C19 C18 C22 N5 132.1(3) . . . . ? 
C17 C18 C22 N5 -51.8(5) . . . . ? 
C22 N5 C23 C24 -149.4(4) . . . . ? 
C26 N5 C23 C24 18.8(4) . . . . ? 
N5 C23 C24 C25 -35.6(4) . . . . ? 
C23 C24 C25 C26 39.4(4) . . . . ? 
C22 N5 C26 C25 174.6(3) . . . . ? 
C23 N5 C26 C25 5.4(4) . . . . ? 
C24 C25 C26 N5 -27.1(4) . . . . ? 
C28 N6 C27 O2 4.6(5) . . . . ? 
C31 N6 C27 O2 168.1(4) . . . . ? 
C28 N6 C27 C20 -176.4(3) . . . . ? 
C31 N6 C27 C20 -12.9(5) . . . . ? 
C21 C20 C27 O2 131.5(4) . . . . ? 
C19 C20 C27 O2 -46.7(5) . . . . ? 
C21 C20 C27 N6 -47.5(5) . . . . ? 
C19 C20 C27 N6 134.3(3) . . . . ? 
C27 N6 C28 C29 174.8(3) . . . . ? 
C31 N6 C28 C29 8.8(4) . . . . ? 
N6 C28 C29 C30 -30.0(4) . . . . ? 
C28 C29 C30 C31 40.0(4) . . . . ? 
C27 N6 C31 C30 -148.8(4) . . . . ? 
C28 N6 C31 C30 15.8(4) . . . . ? 
C29 C30 C31 N6 -34.5(4) . . . . ? 
 
_diffrn_measured_fraction_theta_max    0.978 
_diffrn_reflns_theta_full              31.45 
_diffrn_measured_fraction_theta_full   0.978 
_refine_diff_density_max    0.591 
_refine_diff_density_min   -0.560 
_refine_diff_density_rms    0.094 
